# Supplementary material
Source: HighWire-hosted journal article supplement (https://www.annfammed.org/highwire/filestream/8010/field_highwire_adjunct_files/0/Walter_Suppl_Table_1-2.pdf)
Supplement: Walter_Suppl_Table_1-2.pdf [file Walter_Suppl_Table_1-2.pdf]

Online Supplementary Material

Walter FM, Emery J. 'Coming down the line'—patients' understanding of their family history of common chronic disease. *Ann Fam Med.* 2005;3:405-414.

<http://www.annfammed.org/cgi/content/full/3/5/405/DC1>

**Supplemental Table 1. Interview Schedule**

**Introduction**

**Sociodemographic questionnaire**

**General discussion**

Prompt questions may include the following:

A. Core questions

- Do you think that [disease] runs in families?
- Why do you think that [disease] runs in families?
- Do you think much about having a family history?
- Is it an issue for you?

B. Specific questions

- What do you feel about your personal risk of this [disease]?
- What do you think makes it matter to you?
- Are there features which, you think, make a family history more serious?
- What do you understand about inheritance?
- What do you feel makes you prone or vulnerable to your relative's illness?
- Can you tell me about what helps you deal with your family history?
- How do you cope with the uncertainty?

**Pedigree construction**

Paper pedigree to ascertain names, ages at diagnosis and death, and relationships

**Conclusions**

**Supplemental Table 2. Participants for Whom Perceived Likeness With a Parent Affects Risk Perception**

| <b>Patient No.<br/>Sex, Age</b> | <b>Side of Family With Illness<br/>Side: Disease</b> | <b>Perceived (Actual*) Risk</b>               | <b>Sex :Likeness</b>  | <b>Predominant Features of Likeness</b> | <b>Positive Likeness Effect on Risk Perception</b>                                                                                                                              |
|---------------------------------|------------------------------------------------------|-----------------------------------------------|-----------------------|-----------------------------------------|---------------------------------------------------------------------------------------------------------------------------------------------------------------------------------|
| 04<br>Female, 56 y              | M: leukemia<br>F: bladder cancer                     | Average (average)                             | Female:<br>female     | Personality<br>Ways                     | "Female cancer more likely to run down female side of family."                                                                                                                  |
| 06<br>Female, 58 y              | M: breast cancer<br>F: Parkinson's disease           | High (average)                                | Female: male          | Personality<br>Ways                     | "I shared a lot of characteristics with [my mother], but I didn't identify in quite the same way as with [my father], although I was close to her."                             |
| 07<br>Female, 44 y              | M: uterus and bowel cancer<br>F: heart disease       | CA: High (moderate)<br>CAD: Average (average) | Female:<br>Female     | Personality<br>Ways                     | "I'm quite like my mum, I must admit, in other ways too."                                                                                                                       |
| 08<br>Male, 39 y                | M: heart disease                                     | Moderate (moderate)                           | Male: female          | Looks<br>Personality<br>Ways            | "Everybody says how much we do look alike ..."                                                                                                                                  |
| 09<br>Male, 52 y                | F: bowel<br>F's father: stomach cancer               | Moderate (average)                            | Male: male            | Looks<br>Ways                           | "People have always said I was just like my father, same mannerisms as him."                                                                                                    |
| 10<br>Female, 38 y              | M: breast cancer                                     | Moderate (average)                            | Female:<br>female     | Looks<br>Personality<br>Feelings        | "As I'm getting older, I'm really starting to look like her now, and feel like her. I guess that it makes you think I am like her, and maybe I'm going to get the same as her." |
| 12<br>Male, 37 y                | F: heart disease                                     | Average (average)                             | Male: female          | Ways                                    | "You're like the person in your ways. Certainly we're not going on looks, and we're going on ways of behavior and hereditary illnesses."                                        |
| 14<br>Male, 31 y                | F: esophageal cancer and heart disease               | CA: High (average)<br>CAD: Average (average)  | Male: male and female | Looks<br>Personality                    | "I'm probably like my mum but actually minus the neurosis. Actually, could I change my mind a little about that, because I suppose I'm like my dad as well in some ways."       |

*Continued*

Online Supplementary Data

<http://www.annfammed.org/cgi/content/full/3/5/405/DC1>

|                    |                                                              |                                                      |                               |                         |                                                                                                                                                                                                                             |
|--------------------|--------------------------------------------------------------|------------------------------------------------------|-------------------------------|-------------------------|-----------------------------------------------------------------------------------------------------------------------------------------------------------------------------------------------------------------------------|
| 16<br>Female, 52 y | M, sister, and F's<br>mother: breast cancer                  | Moderate (average)                                   | Female:<br>female             | Looks<br>Ways           | "I suppose [I'm like my mother], and the other things as well like ... her marriage had split up a few years before mine had.... I would say more it's the close relationship than the genetic stuff."                      |
| 17<br>Female, 38 y | M: heart disease                                             | Moderate (average)                                   | Female:<br>female             | Feelings                | "Both me and my sister, we're definitely [very like her], we're bound to inherit things from mum aren't we? I think we felt much closer to her than we do to dad."                                                          |
| 22<br>Female, 45 y | M: multiple sclerosis<br>F: diabetes                         | Moderate (average)                                   | Female: male                  | Personality<br>Feelings | "I'm actually very much like my Dad, so I probably take it on board a bit more because I have a lot of his other characteristics, looks, and the creative side. Temperament, yes, definitely Dad's side."                   |
| 24<br>Male, 38 y   | F: heart disease                                             | Moderate<br>(moderate)                               | Male: male                    | Personality             | "I'd definitely say I'm more like my dad than my mother, probably health wise and in physical characteristics.... I'm told that I'm very similar to him."                                                                   |
| 25<br>Female, 48 y | F: diabetes                                                  | Average (average)                                    | Female: male                  | Personality             | "... a similar personality, everyone used to say that, yeah."                                                                                                                                                               |
| 26<br>Female, 44 y | F: breast and bowel<br>cancer<br>M's mother: bowel<br>cancer | Average (average)                                    | Female:<br>female             |                         | "I have to be more concerned with the female members of my family don't I?"                                                                                                                                                 |
| 30<br>Female, 52 y | M: heart disease and<br>diabetes<br>F: heart disease         | CAD: high<br>(moderate)<br>DM: moderate<br>(average) | Female:<br>female and<br>male | Looks<br>Feelings       | "We all look more like our father, really, except my brother, who's a little bit like my mother. It's really difficult: I felt more that my genes are like my father's, except my weight. Emotionally more like my mother." |

M = mother; F = father; CA = cancer; CAD = coronary artery disease; DM = diabetes mellitus.

\* Actual risk, calculated according to current risk assessment criteria.
